# Supplementary material
Source: PubMed Central journal article supplement (PMC5026483)
Supplement: NIHMS815056-supplement-supplemental_figure_legends_and_and_table.pdf [file NIHMS815056-supplement-supplemental_figure_legends_and_and_table.pdf]

## **Supplementary Data:**

**Figure S1: HMC1.2 cell line has constitutively activated NFAT2, NFAT2 and NFAT4 species.** Fractionated cell lysates from HMC1.2 cells treated for 2 hours with 1 $\mu$ M CSA or 100nM TPA + 1 $\mu$ M IonM.  $\beta$ -Tubulin shown as a cytoplasmic loading control, Lamin A/C shown as a nuclear loading control.

**Figure S2: RT-PCR of transcripts modulated by 24 hour treatment with CSA.** P815 cells were treated for 24 hours with 1 $\mu$ M CSA, before transcripts were quantified. Expression results were analyzed using the comparative  $C_T$  method (also known as the  $2^{-\Delta\Delta C_T}$  method, as described in the methods section. Results are plotted as the percent expression compared with untreated cells.

**Figure S3: CNPIs do not modulate KIT signaling and KIT inhibitors do not affect NFAT localization.** **A)** Cytoplasmic lysates from P815 cells treated with CNPIs, CSA or FK506 for 3 hours. **B)** Cytoplasmic lysates from P815 cells treated with KIT inhibitors, dasatinib or imatinib (STI) for 3 hours.  $\beta$ -actin is shown as a loading control.

**Figure S4: Combination therapy does not enhance the effect of KIT inhibitors on KIT or downstream signaling.** Whole cell extracts from P815 cells treated for 3 hours with single agents or combination.

**Table S1: Summary of KIT-mutant mast cell characteristics**

**Table S2: Summary of antibodies used in immunoblotting experiments**

**Table S3: qRT-PCR analysis of NFAT expression in KIT-mutant mast cell lines**
