# Supplementary material
Source: PubMed Central journal article supplement (PMC5026483)
Supplement: NIHMS815056-supplement-Supplemental_figures.pdf [file NIHMS815056-supplement-Supplemental_figures.pdf]

Supplementary Figure 1. HMC1.2 cells  
have constitutively activated NFAT1,  
NFAT2 and NFAT4 species

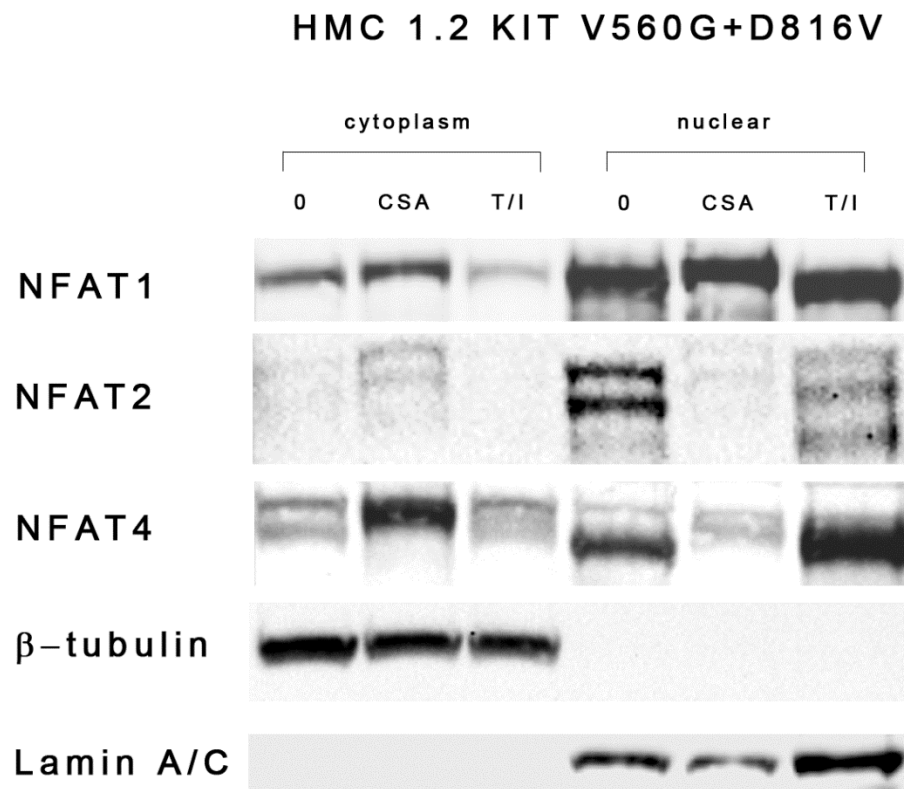

Supplementary Figure 2 Part 1. RT-PCR of transcripts modulated by 24 hour treatment with CSA.

### CCND2

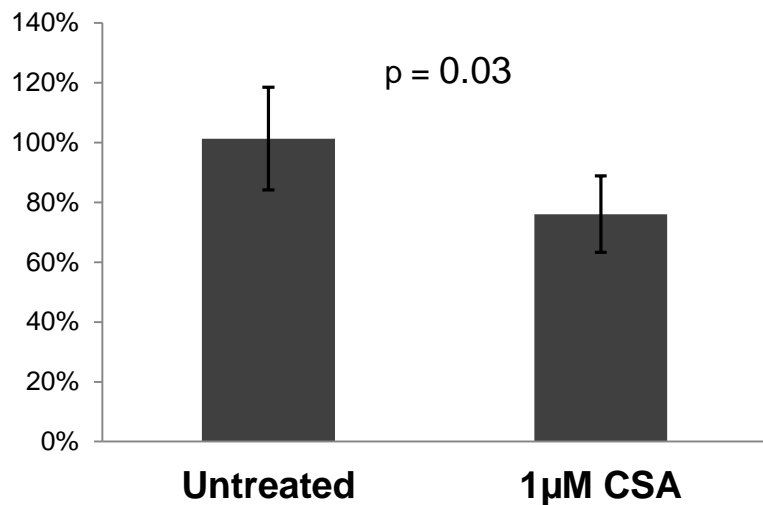

### PIM2

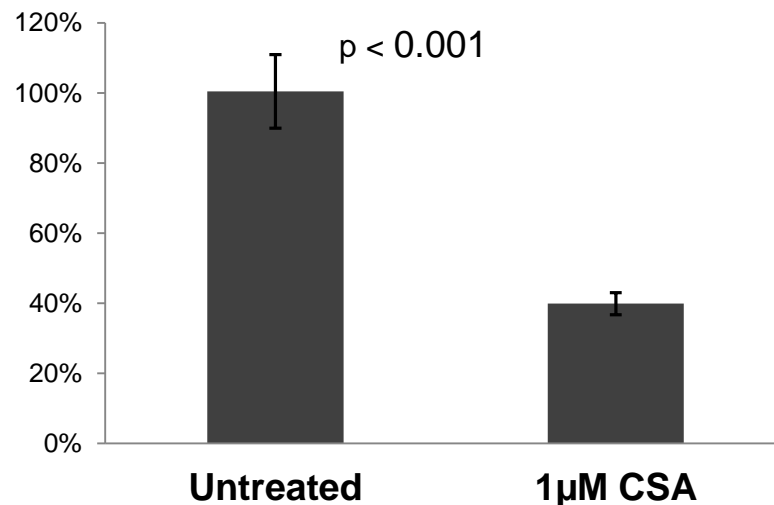

### BCL6

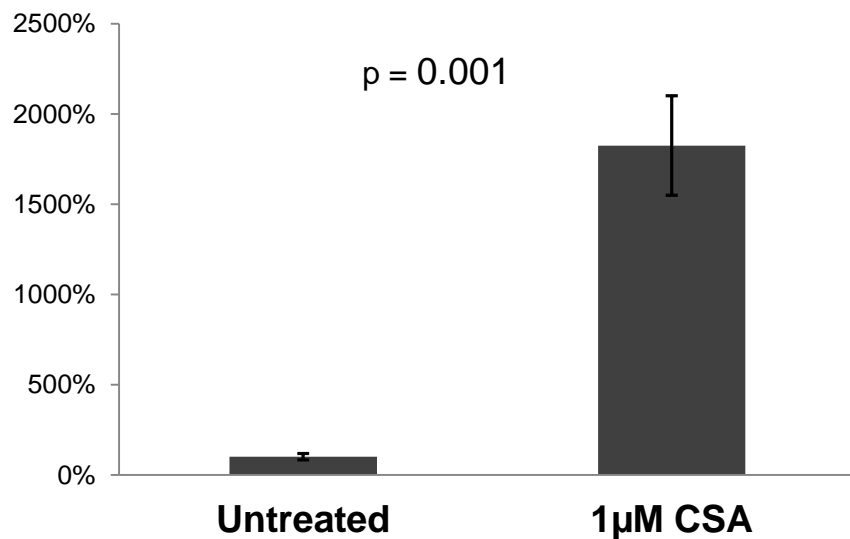

### MYC

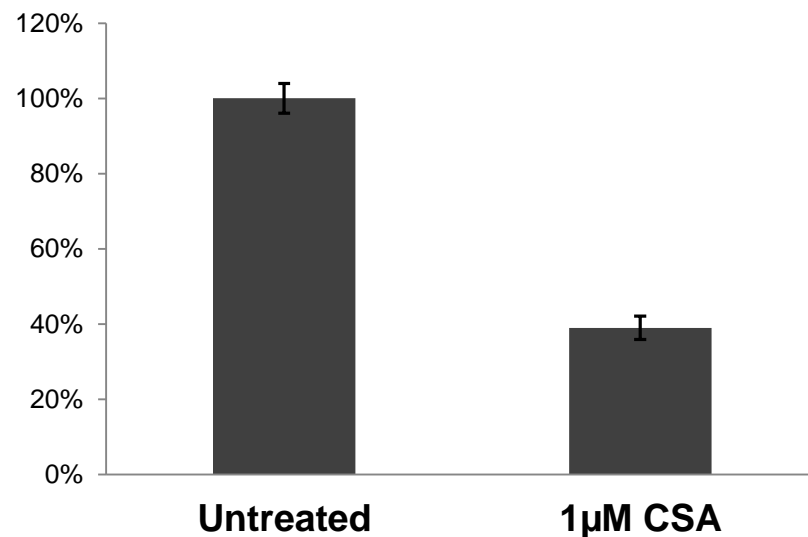

## SOCS1

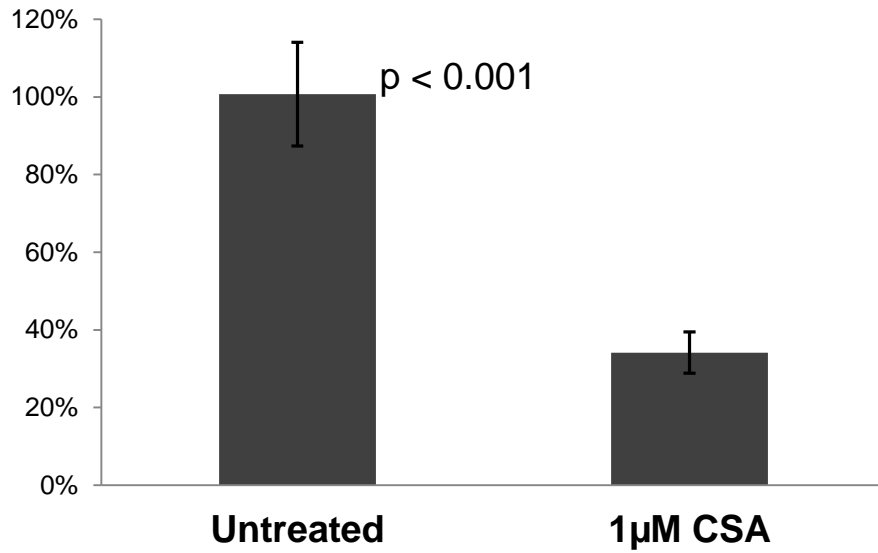

## CCND1

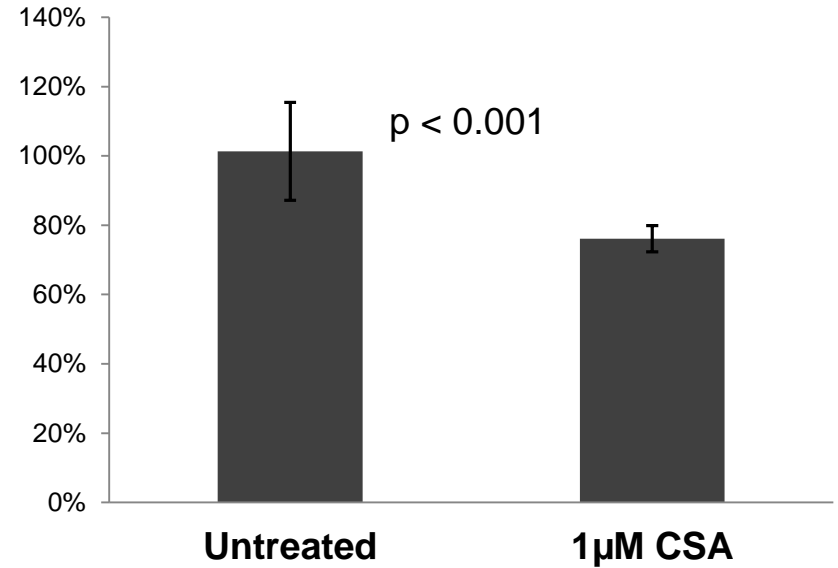

## CISH

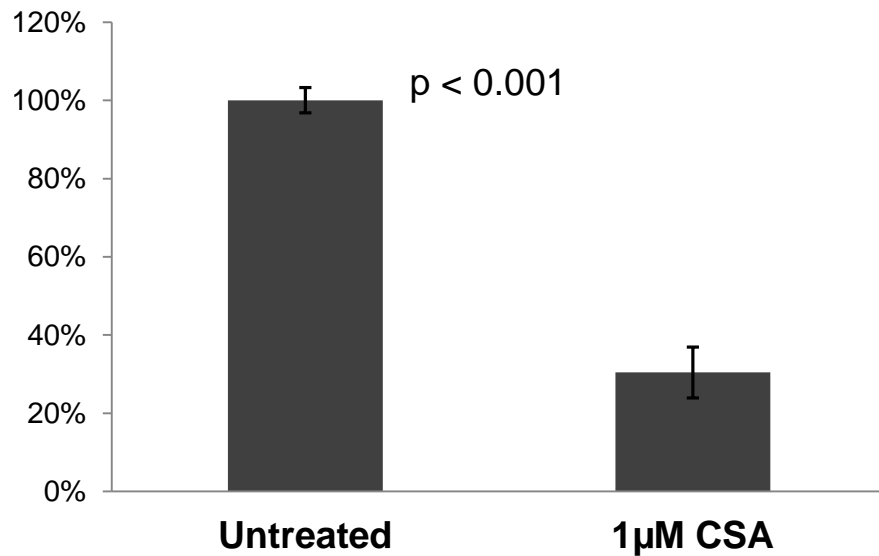

Supplementary Figure 2 Part 2. RT-PCR of transcripts modulated by 24 hour treatment with CSA.





Supplementary Figure 4. Combination treatment does not enhance the effect of KIT inhibitors on KIT autophosphorylation or downstream signaling.

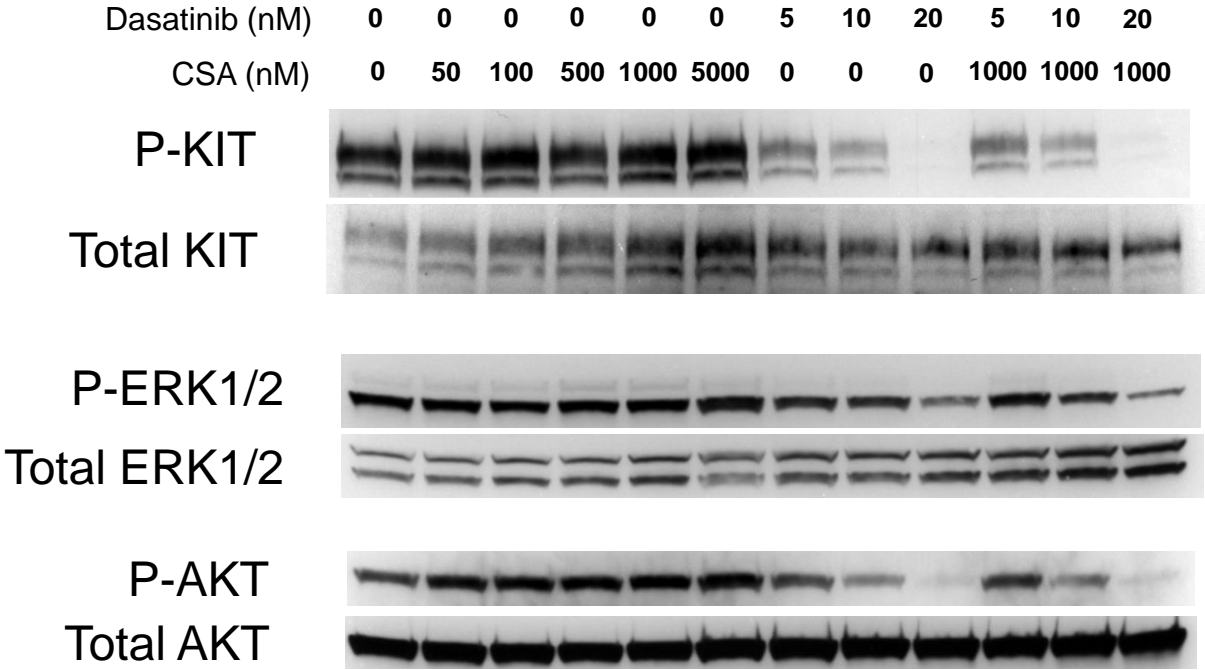

Supplementary Table 1. Summary of KIT-mutant cell lines studied in this manuscript.

| <b>Cell Line</b> | <b>Species</b> | <b>KIT mutation</b> | <b>Media Conditions</b>                            |
|------------------|----------------|---------------------|----------------------------------------------------|
| P815             | Murine         | D814Y               | DMEM+10% FBS, 1% pen strep, 1% L-Glut              |
| RBL2H3           | Murine         | D817Y               | MEM+10% FBS, 1% pen strep, 1% L-Glut               |
| BR               | Canine         | L575P               | DMEM+2% calf serum, .25g/L histidine, 25mL/L HEPES |
| C2               | Canine         | 16bp insertion      | DMEM+2% calf serum, .25g/L histidine, 25mL/L HEPES |
| HMC1.1           | Human          | V560G               | DMEM+10% FBS, 1% pen strep, 1% L-Glut              |
| HMC1.2           | Human          | V560G+D816V         | DMEM+10% FBS, 1% pen strep, 1% L-Glut              |

Supplementary Table 2. Antibodies used in immunoblotting experiments.

| <b>Antibody</b> | <b>Concentration</b> | <b>Company</b> | <b>Catalog #</b> |
|-----------------|----------------------|----------------|------------------|
| NFAT1           | 1:1000               | Cell Signaling | 4389             |
| NFAT2           | 1:1000               | Thermo Sci     | MA3-024          |
| NFAT3           | 1:400                | Santa Cruz     | sc-13036         |
| NFAT4           | 1:400                | Santa Cruz     | sc-8321          |
| B-actin         | 1:1000               | Cell Signaling | 4970             |
| p-KIT           | 1:1000               | Cell Signaling | 3391             |
| Total KIT       | 1:1000               | Cell Signaling | 3074             |
| p-ERK           | 1:1000               | Cell Signaling | 9101             |
| Total ERK       | 1:1000               | Cell Signaling | 9102             |
| p-AKT           | 1:1000               | Cell Signaling | 9271             |
| Total AKT       | 1:1000               | Cell Signaling | 9272             |
| Lamin A/C       | 1:400                | Santa Cruz     | sc-7292          |
| MYC             | 1:1000               | Cell Signaling | 5605             |
| Pim2            | 1:400                | Santa Cruz     | sc-13514         |
| p-STAT3         | 1:1000               | Cell Signaling | 9131             |
| p-STAT5         | 1:1000               | Cell Signaling | 9351             |
| Total STAT3     | 1:1000               | Cell Signaling | 9132             |
| Total STAT5     | 1:1000               | Cell Signaling | 9352             |
| B-tubulin       | 1:1000               | Cell Signaling | 2128             |



Supplementary Table 3. NFAT expression in KIT-mutant mast cells referenced in this manuscript.

| <b>Cell Line</b> | <b>NFAT1</b> | <b>NFAT2</b> | <b>NFAT3</b> | <b>NFAT4</b> |
|------------------|--------------|--------------|--------------|--------------|
| P815             | X            | X            |              | X            |
| HMC1.1           | X            | X            |              | X            |
| HMC1.2           | X            | X            |              | X            |
| BR               |              | X            |              | X            |
| C2               |              | X            |              | X            |
| RBL2H3           | X            | X            |              | X            |
